# Supplementary material for: Plate reduction in southern Japanese freshwater populations of threespine stickleback (Gasterosteus aculeatus)
Source: PubMed Central journal article supplement (PMC10191778; doi:10.1002/ece3.10077), 2023-05-17

Figure.S1

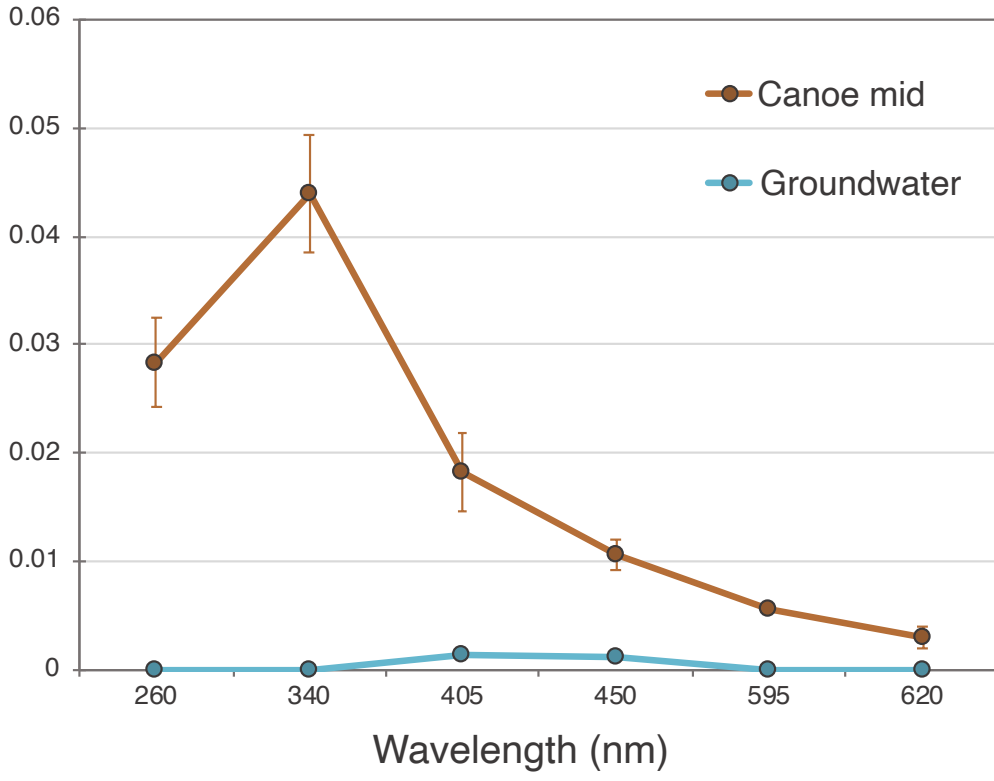

Figure.S2

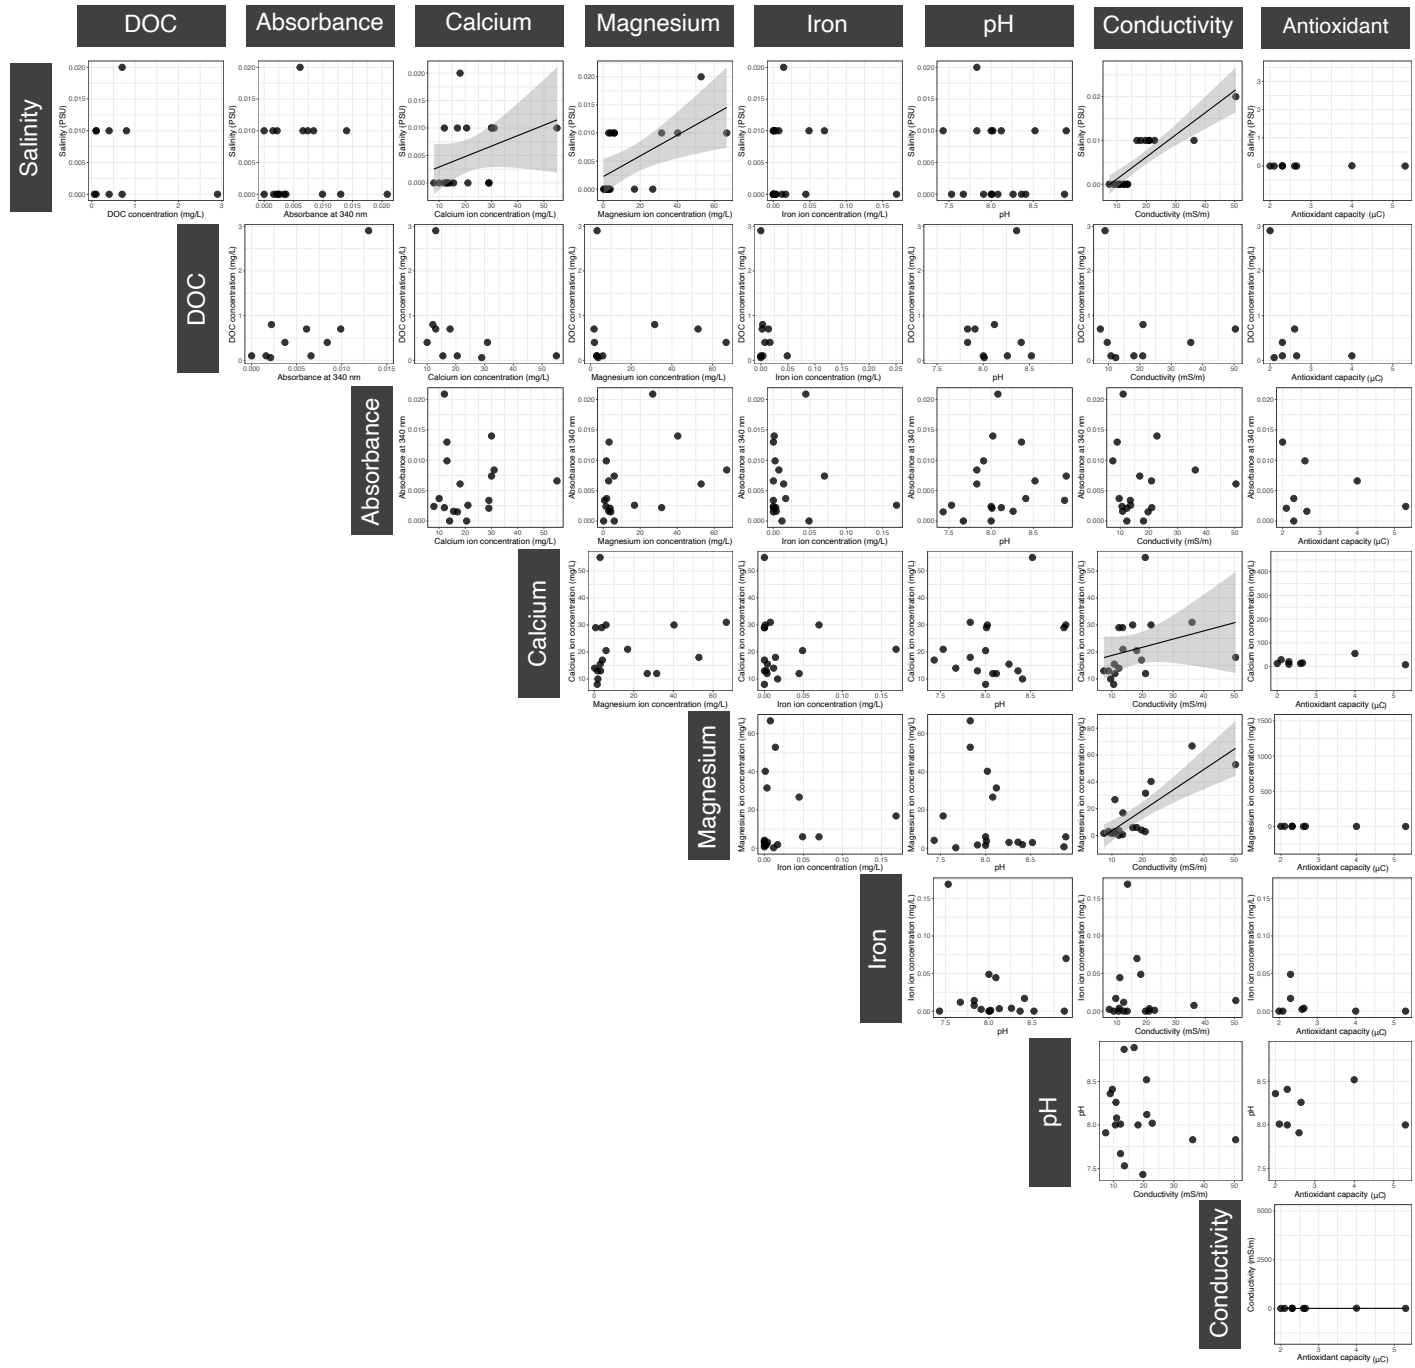

Figure.S3

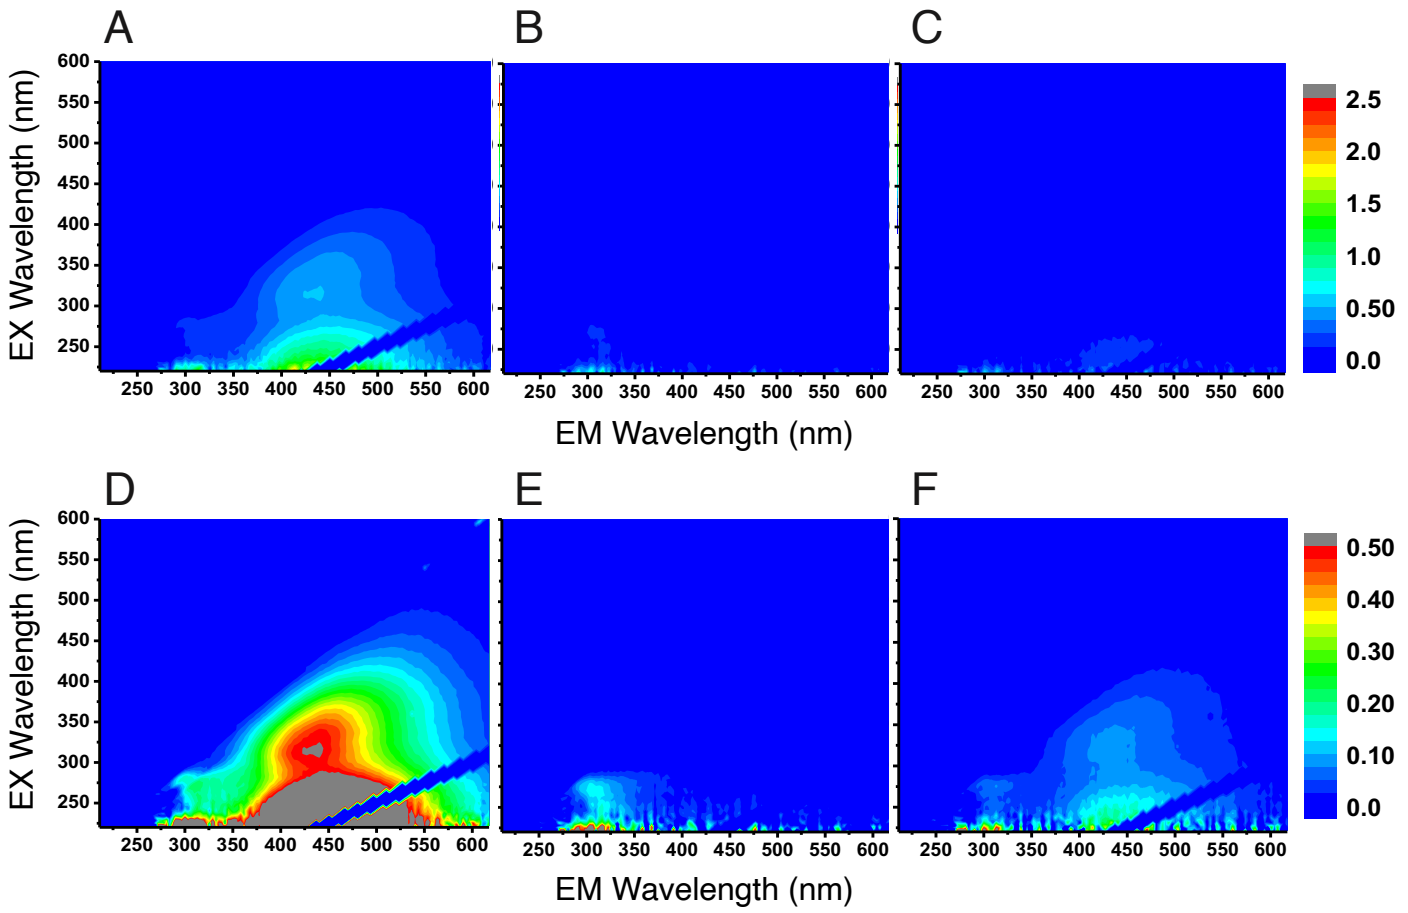

Figure.S4

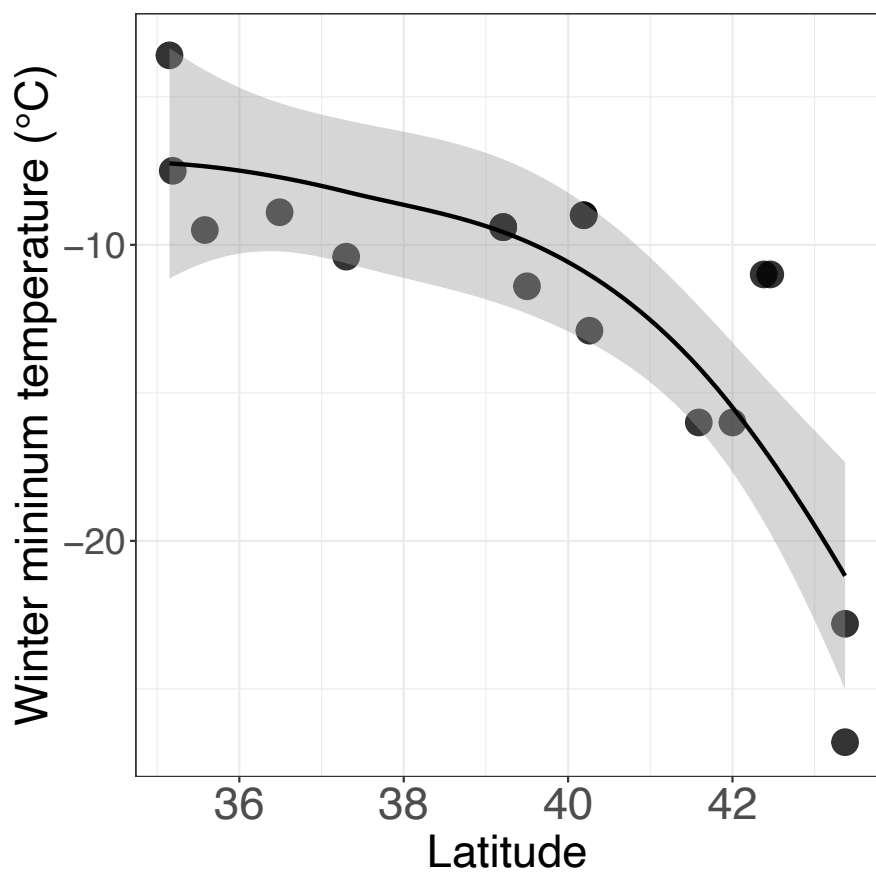

Supplement: ECE3-13-e10077-s002.pdf [file ECE3-13-e10077-s002.pdf]
